# Supplementary material
Source: Springer Nature journal article supplement (https://www.springermedizin.de/resource/supplementary/12874_2007_234_MOESM1_ESM.pdf/9434050)
Supplement: MOESM1 [file 9434050]

## Supplementary Material: Methods for Simulations

The simulated true and observed relative risks were calculated using this equation:

$$RR_i^{obs} = \frac{\frac{(RR^{true} \times a_i) + c_i}{a_i + c_i}}{\frac{(RR^{true} \times b_i) + d_i}{b_i + d_i}} \quad (1)$$

Where  $RR_i^{obs}$  is the observed relative risk,  $RR^{true}$  is the true relative risk and  $a_i$  is the number of true positives,  $b_i$  is the number of false negatives,  $c_i$  is the number of false positives and  $d_i$  the number of true negatives up to wave  $i$  (as shown in Table 1). The  $a_i - d_i$ 's for each outcome were calculated for a range of true prevalence rates by solving the simultaneous equations:

$$a_i + b_i = true_i \quad (2)$$

$$a_i + c_i = obs_i$$

$$b_i + c_i = misscl_i$$

$$a_i + b_i + c_i + d_i = 100$$

Where  $true_i$ ,  $obs_i$ , and  $misscl_i$  were the percentage of true prevalence, observed prevalence and misclassification up to wave  $i$ . After calculating these parameters, an iterative application of Equation 1 was used to determine the 'true' relative risk  $RR^{true}$  that would lead to the relative risks that were observed for all responders (i.e. at wave 4) for specified prevalence and misclassification rates. A further (direct) application of Equation 1 was then used to calculate the cumulative observed relative risks at each wave which would result from these simulated true relative risks.

Table 1: Notation for observed outcome status of study participants up to wave  $i$

| True status       | Observed status |                   |
|-------------------|-----------------|-------------------|
|                   | % with outcome  | % without outcome |
| % with outcome    | $a_i$           | $b_i$             |
| % without outcome | $c_i$           | $d_i$             |
